# Supplementary material for: Hierarchical porous carbon microrods composed of vertically aligned graphene-like nanosheets for Li-ion batteries
Source: Royal Society of Chemistry journal article supplement (doi:10.1039/c5ta05183e), 2015-01-01
Supplement: c5ta05183e1.pdf [file c5ta05183e1.pdf]

## Supporting Information

### Hierarchical porous carbon microrods composed of vertically aligned graphene-like nanosheets for Li-ion batteries

Zongmin Zheng,<sup>a</sup> Xin Zhang,<sup>b</sup> Fei Pei,<sup>a</sup> Yan Dai, Xiaoliang Fang,<sup>\*a</sup> Taihong Wang<sup>a</sup> and Nanfeng Zheng<sup>\*b</sup>

a. Pen-Tung Sah Institute of Micro-Nano Science and Technology, Xiamen University, Xiamen Fujian 361005, China. E-mail: x.l.fang@xmu.edu.cn

b. Department of Chemistry, College of Chemistry and Chemical Engineering, Xiamen University, State Key Laboratory of Physical Chemistry of Solid Surfaces, Xiamen, Fujian 361005, China. E-mail: nfzheng@xmu.edu.cn

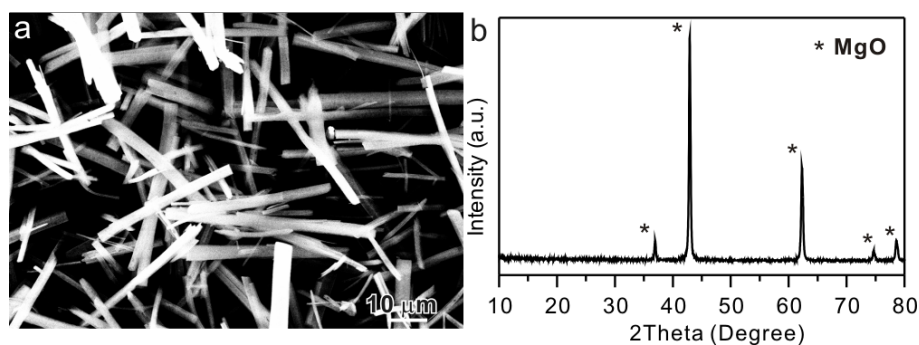

Fig. S1 SEM image and XRD pattern of the MgO microrods.

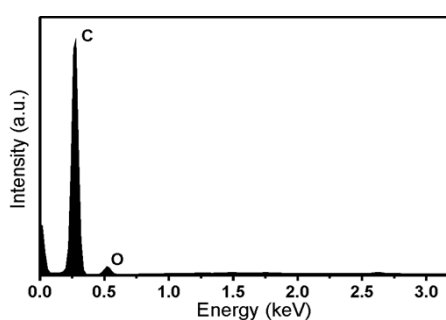

Fig. S2 EDX spectrum of HPCM-900.

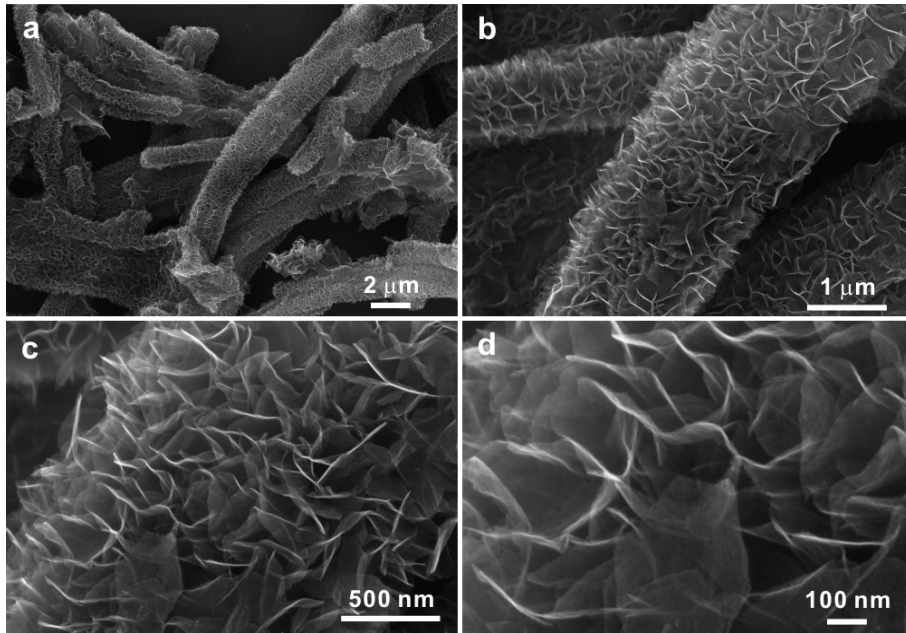

**Fig. S3** SEM images of HPCM-800.

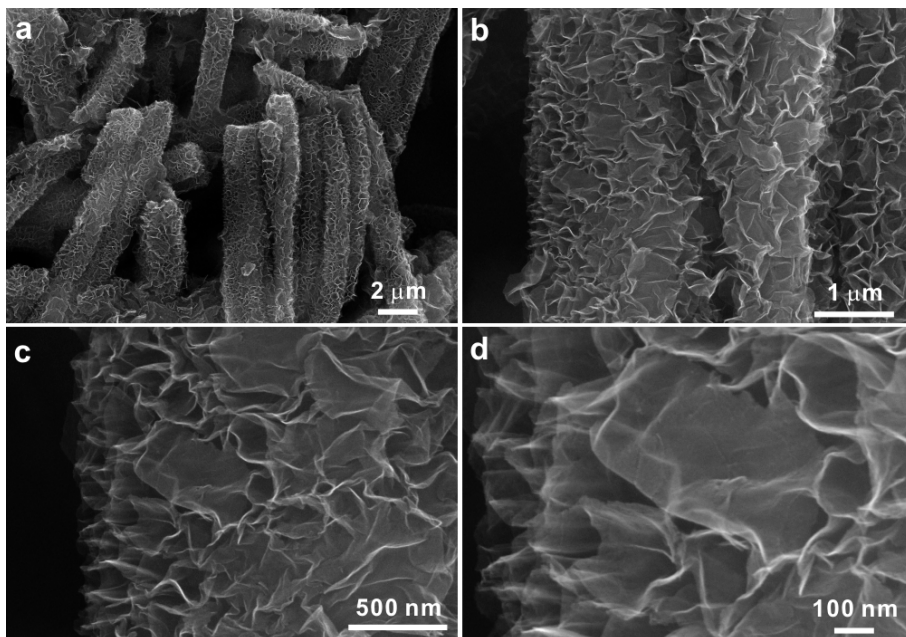

**Fig. S4** SEM images of HPCM-700.

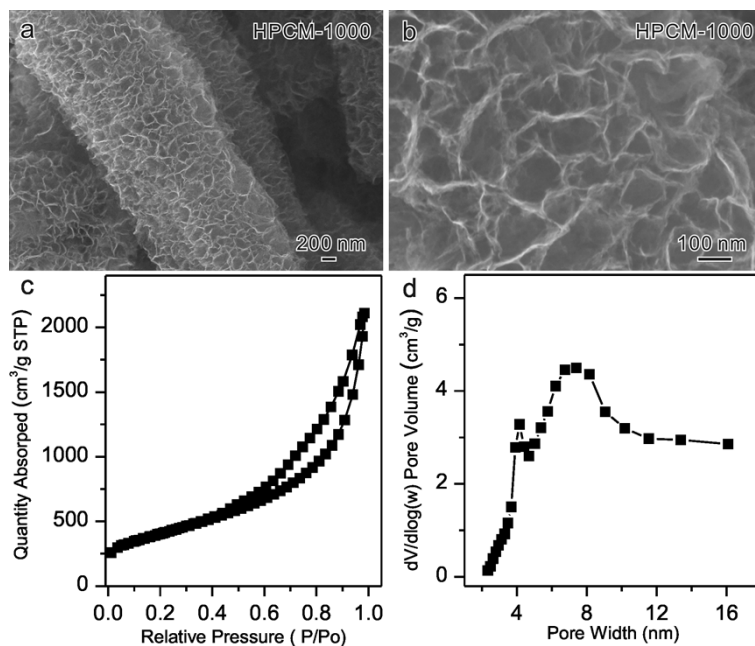

**Fig. S5** SEM images (a, b), N<sub>2</sub> sorption isotherm (c) and pore size distribution (d) of HPCM-1000.

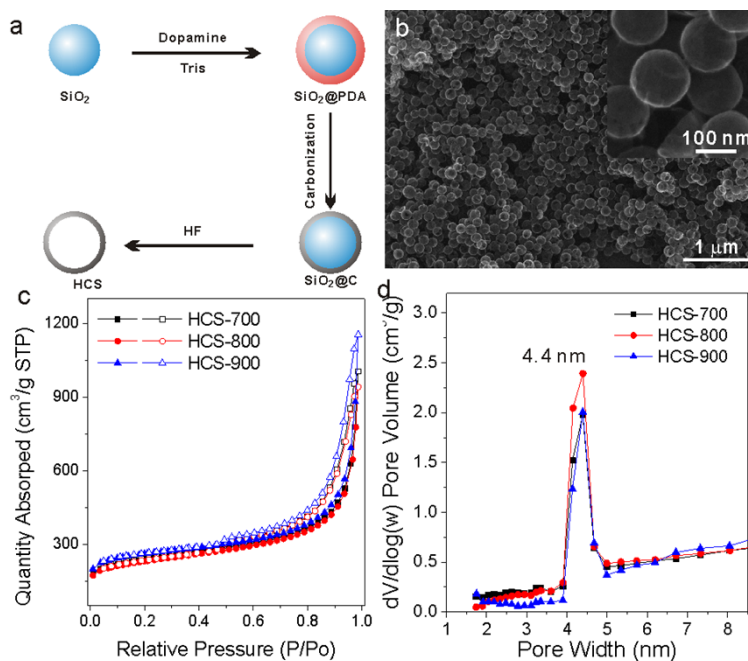

**Fig. S6** (a) Schematic illustration for the synthesis of HCS, (b) SEM image of HCS-900, N<sub>2</sub> sorption isotherms (c) and pore size distributions (d) of HCS obtained at the different temperatures.

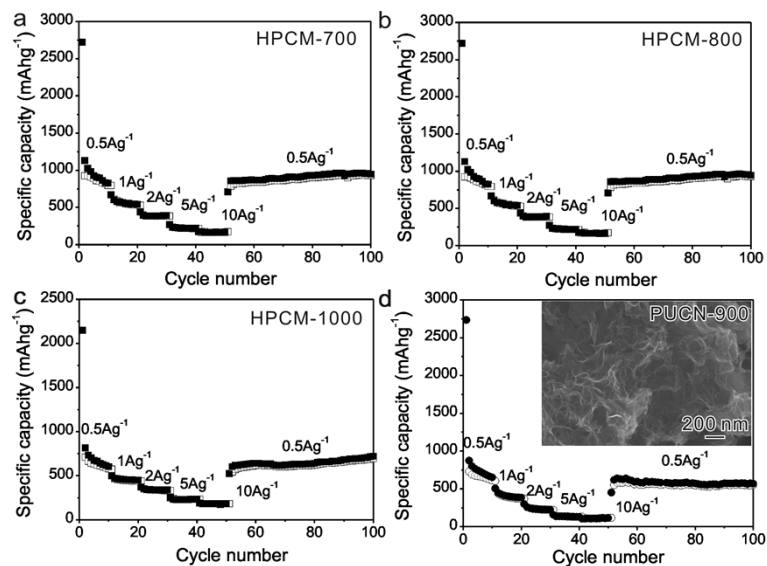

**Fig. S7** The rate performances: (a) HPCM-700, (b) HPCM-800, (c) HPCM-1000, (d) PUCN-900, (the inset: SEM image of PUCN-900).

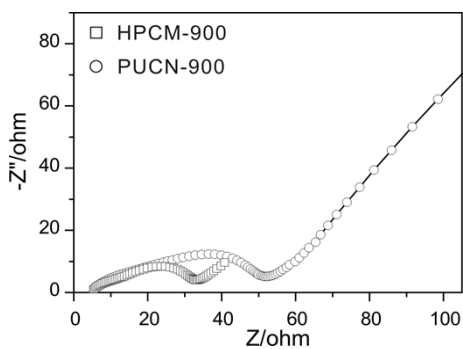

**Fig. S8** Nyquist plots of the HPCM-900 and PUCN-900 electrodes after 50 cycles.

**Table S1.** Graphene and graphene-like carbon anodes evaluated at high rate

| Carbon anode                           | charge/discharge rate | capacity<br>(mAh/g) | References |
|----------------------------------------|-----------------------|---------------------|------------|
| HPCM-900                               | 5A/g                  | 312                 | This work  |
|                                        | 10A/g                 | 246                 |            |
| MgO-templated graphene nanocages       | 10A/g                 | 48                  | Ref. S1    |
| PECVD growth of VAGNs                  | 1.5A/g (4C)           | 297                 | Ref. S2    |
| MgO-templated PUCNs                    | 7.44 A/g(20C)         | 240                 | Ref. S3    |
| Holey graphene papers                  | 10A/g                 | ~75                 | Ref. S4    |
| N-doped graphene                       | 5A/g                  | 296                 | Ref. S5    |
|                                        | 10A/g                 | ~250                |            |
| Hollow mesoporous graphene Spheres     | 7.44A/g               | ~200                | Ref. S6    |
| mesoporous graphene nanosheets         | 5A/g                  | 255                 | Ref. S7    |
| Slat-templated VAGNs                   | 5A/g                  | 265                 | Ref. S8    |
| Ordered mesoporous graphene frameworks | 5A/g                  | 127                 | Ref. S9    |
|                                        | 10A/g                 | 87                  |            |

## References

- [S1] K. X. Wang, Z. L. Li, Y. G. Wang, H. M. Liu, J. S. Chen, J. Holmes and H. S. Zhou, *J. Mater. Chem.* 2010, **20**, 9748.
- [S2] H. Kim, Z. Wen, K. Yu, O. Mao and J. Chen, *J. Mater. Chem.* 2012, **22**, 15514.
- [S3] Z. Fan, J. Yan, G. Ning, T. Wei, L. Zhi and F. Wei, *Carbon* 2013, **60**, 558.
- [S4] X. Zhao, C. M. Hayner, M. C. Kung and H. H. Kung, *ACS Nano* 2011, **5**, 8739.
- [S5] Z. S. Wu, W. C. Ren, L. Xu, F. Li and H. M. Cheng, *ACS Nano* 2011, **5**, 5463.
- [S6] S. Yang, X. Feng, L. Zhi, Q. Cao, J. Maier and K. Mullen, *Adv. Mater.* 2010, **22**, 838.
- [S7] Y. Fang, Y. Lv, R. Che, H. Wu, X. Zhang, D. Gu, G. Zheng and D. Zhao, *J. Am. Chem. Soc.* 2013, **135**, 1524.
- [S8] J. Zhu, K. Sakaushi, G. Clavel, M. Shalom, M. Antonietti and T. P. Fellingner, *J. Am. Chem. Soc.* 2015, **137**, 5480.
- [S9] Y. Jiao, D. Han, L. Liu, L. Ji, G. Guo, J. Hu, D. Yang and A. Dong, *Angew. Chem. Int. Ed.* DOI: 10.1002/anie.201501398.
